# Supplementary material for: Nature of polymeric condensates during furfural rearrangement to cyclopentanone and cyclopentanol over Cu-based catalysts
Source: Royal Society of Chemistry journal article supplement (doi:10.1039/d1nj04027h), 2021-01-01

## Supplementary Information

### **Nature of polymeric condensates during furfural rearrangement to cyclopentanone and cyclopentanol over Cu-based catalysts**

Dongsheng Li,<sup>a</sup> Ziyou Tian,<sup>a</sup> Xichen Cai,<sup>a</sup> Zhanqiao Li,<sup>a</sup> Chen Zhang,<sup>\*a,b</sup> Wei Zhang,<sup>a</sup> Yongji Song,<sup>a</sup> Hong Wang,<sup>a</sup> and Cuiqing Li<sup>\*a,b</sup>

- a. School of New Materials and Chemical Engineering, Beijing Institute of Petrochemical Technology, Beijing, 102617, P. R. China.  
E-mail: zhangc@bipt.edu.cn, licuiqing@bipt.edu.cn
- b. Beijing Key Laboratory of Enze Biomass Fine Chemicals, Beijing Institute of Petrochemical Technology, Beijing 102617, P. R. China

## Table of Contents

1. **Cu particle size of synthesized catalysts**
2. **Blank tests for furfural rearrangement reactions without catalyst**
3. **FT-IR spectrum of fresh catalysts**
4. **Pyrolysis GC-MS results of spent Cu-Ba catalyst**
5. **Original MS traces from pyrolysis GC-MS of spent Cu/Al<sub>2</sub>O<sub>3</sub> catalyst from furfural rearrangement**
6. **Original MS traces from pyrolysis GC-MS of spent Cu/Al<sub>2</sub>O<sub>3</sub> catalyst from furfuryl alcohol rearrangement**

## 1. Cu particle size of synthesized catalysts

**Table S1. Cu particle sizes calculated via Scherrer equation from XRD diffraction peaks.**

| <b>Catalyst</b> | <b>Cu particle size / nm</b> |
|-----------------|------------------------------|
| Cu              | 46.0                         |
| Cu-Na           | 48.7                         |
| Cu-Mg           | 44.1                         |
| Cu-K            | 40.6                         |
| Cu-Ca           | 29.0                         |
| Cu-Ba           | 53.3                         |

## 2. Blank tests for furfural and FOL reactions without catalyst.

**Table S2.** Reactivity of all catalysts for furfural rearrangement reaction at 180 °C.

| Reactant                                                                                                      | Conversion<br>/ % | Yield / % |     | Carbon balance<br>/ % |
|---------------------------------------------------------------------------------------------------------------|-------------------|-----------|-----|-----------------------|
|                                                                                                               |                   | CPO       | CPL |                       |
| FAL                                                                                                           | 47.6              | -         | -   | 52.4                  |
| Reaction conditions: reactant: 0.25 mL furfural in 20 mL water, hydrogen pressure: 1 MPa, reaction time: 4 h. |                   |           |     |                       |

### 3. FT-IR spectrum of all fresh catalysts.

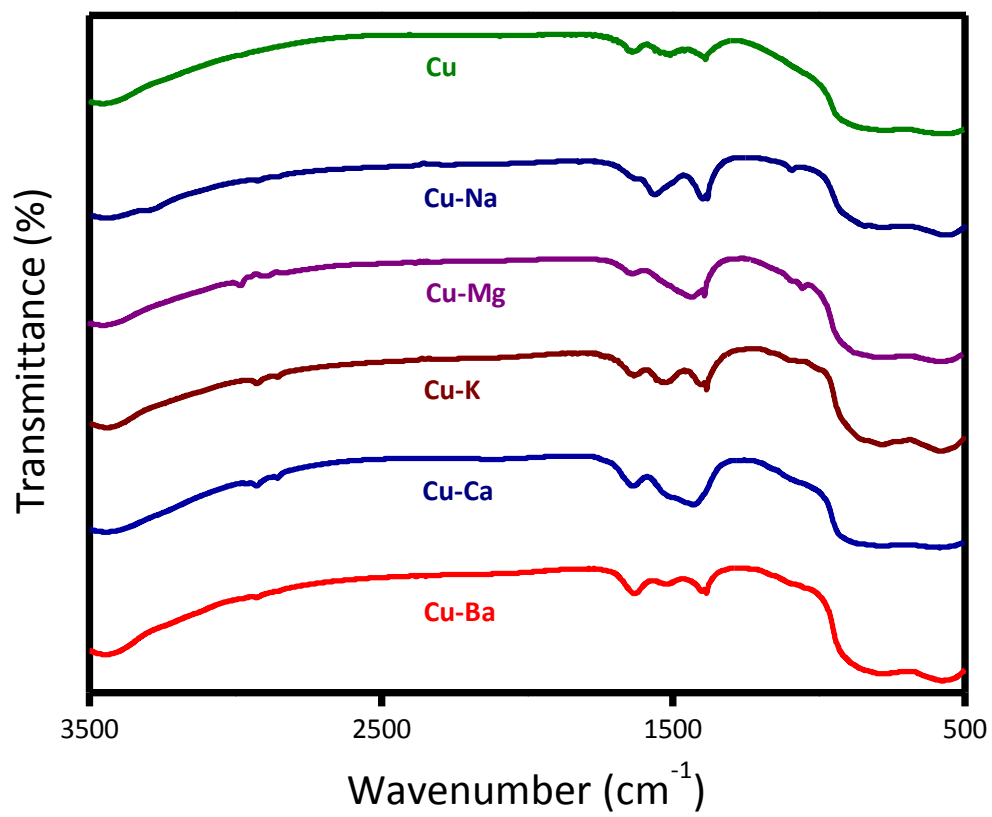

**Figure S1.** FT-IR spectra of all fresh catalysts.

#### 4. Pyrolysis GC-MS of spent Cu-Ba catalyst

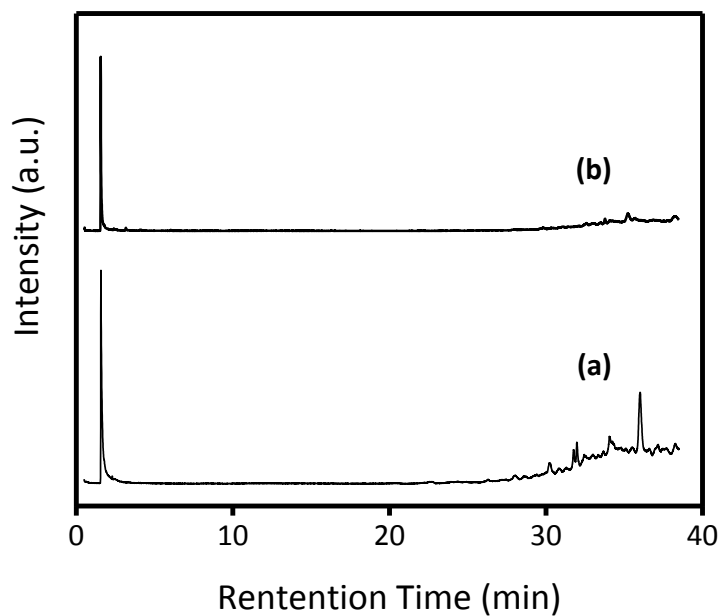

**Figure S2.** Total ion intensity of pyrolysis GC-MS for spent catalysts from (a) furfural rearrangement and (b) FOL rearrangement.

## 5. Original MS traces from pyrolysis GC-MS of spent Cu/Al<sub>2</sub>O<sub>3</sub> catalyst from furfural rearrangement

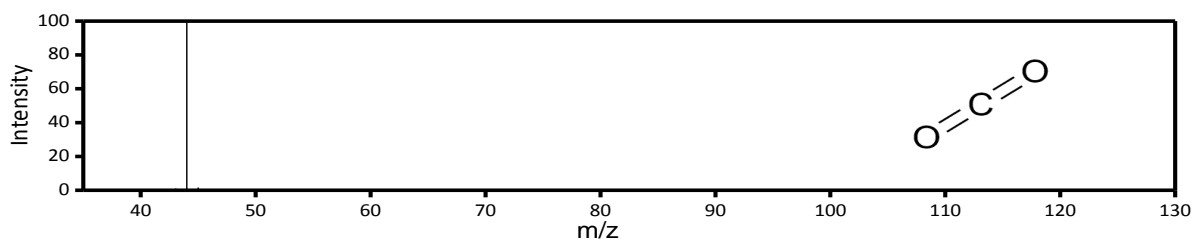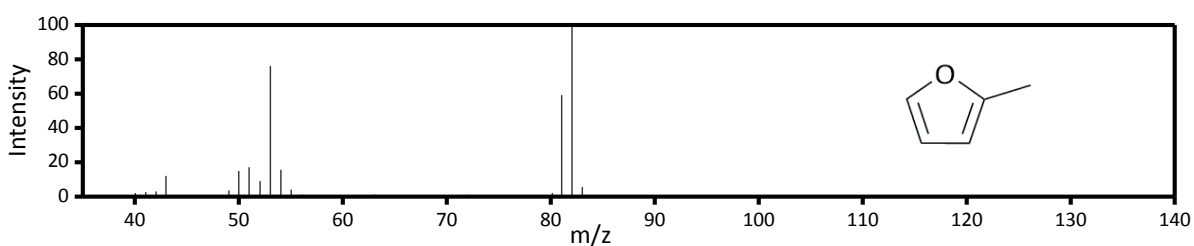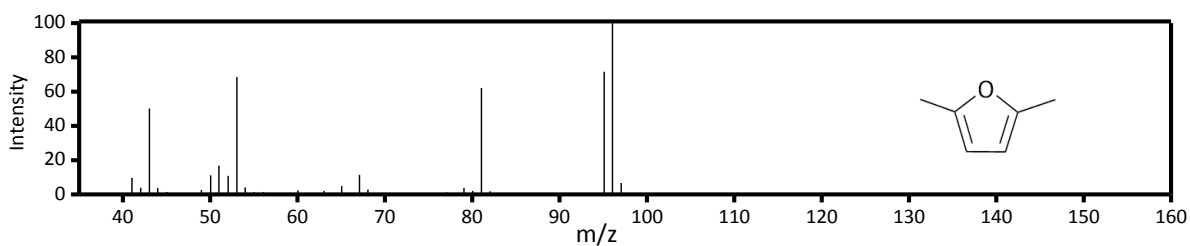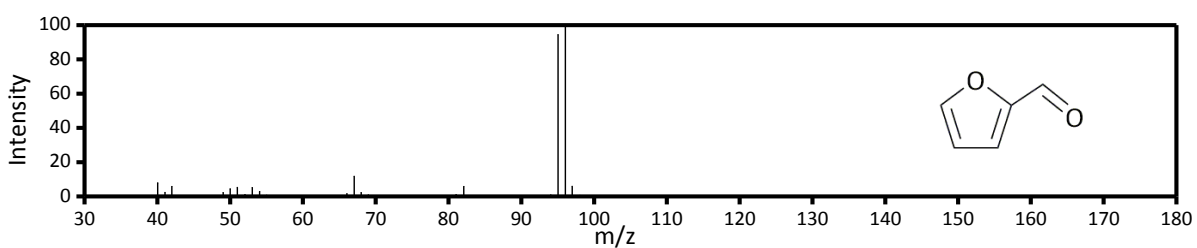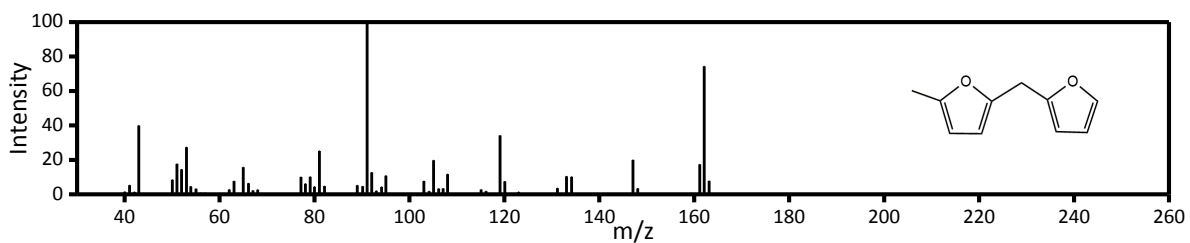

## 6. Original MS traces from pyrolysis GC-MS of spent Cu/Al<sub>2</sub>O<sub>3</sub> catalyst from furfuryl alcohol rearrangement

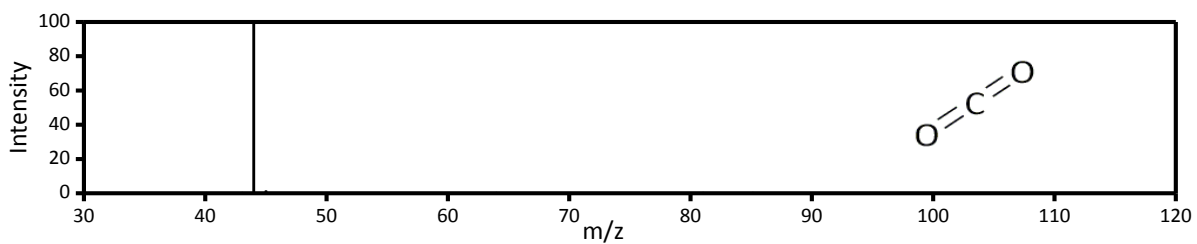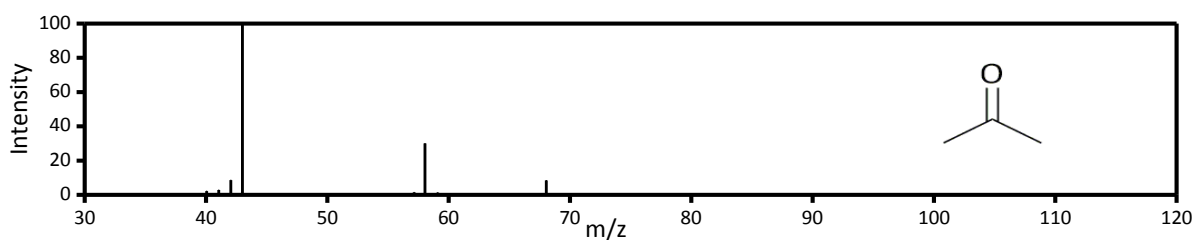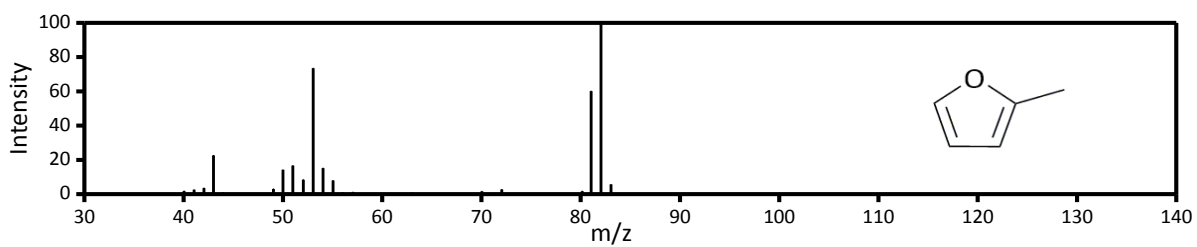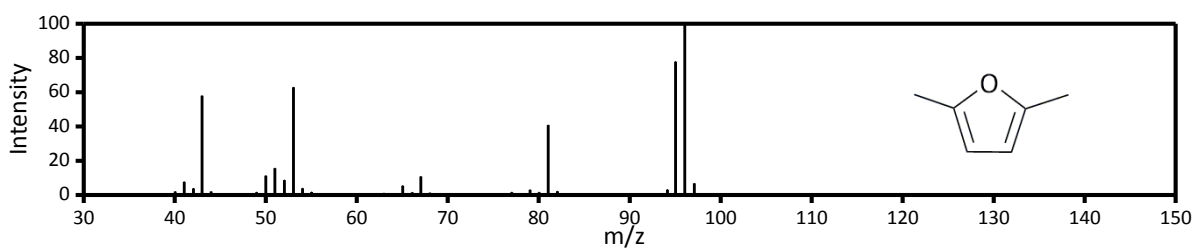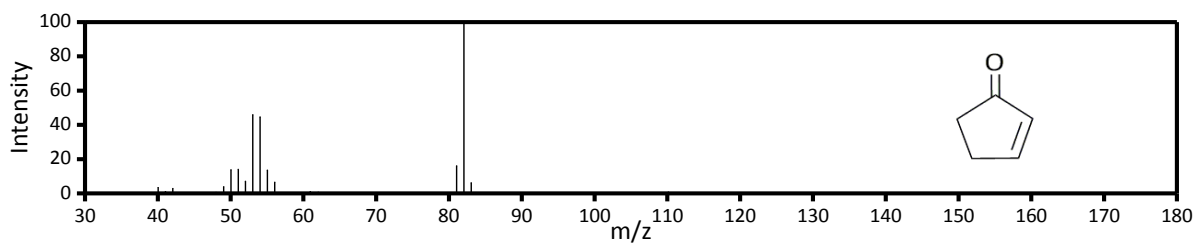

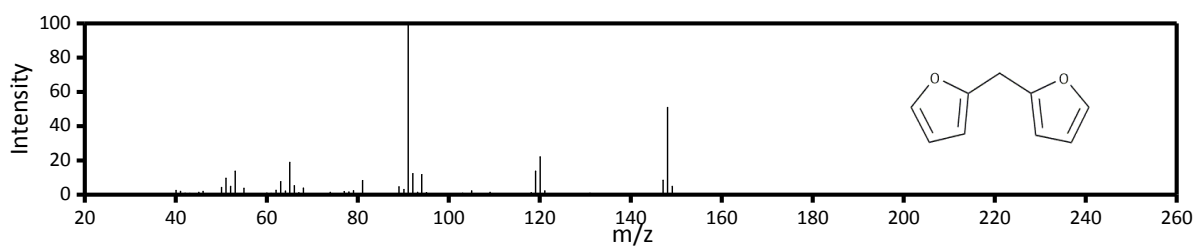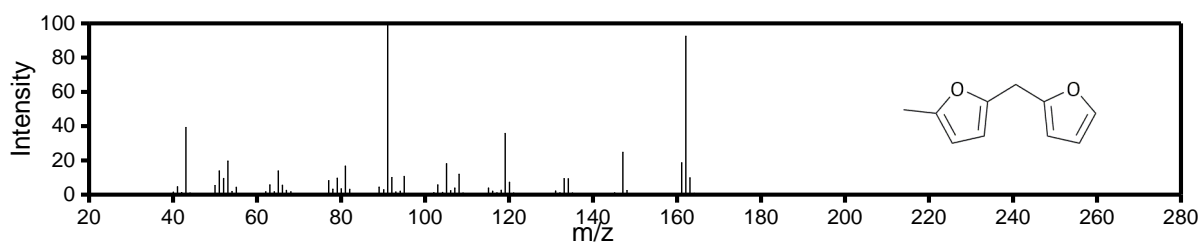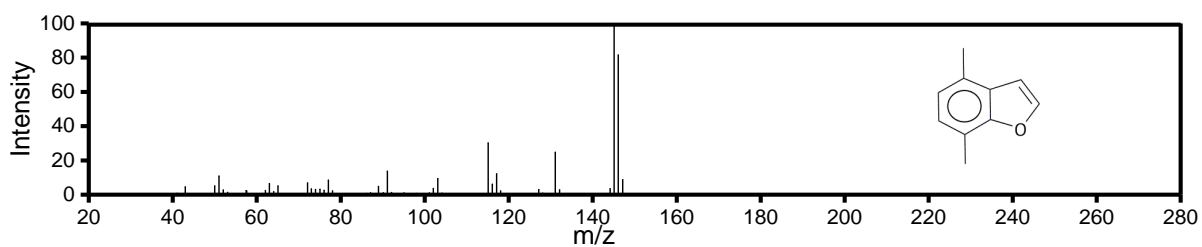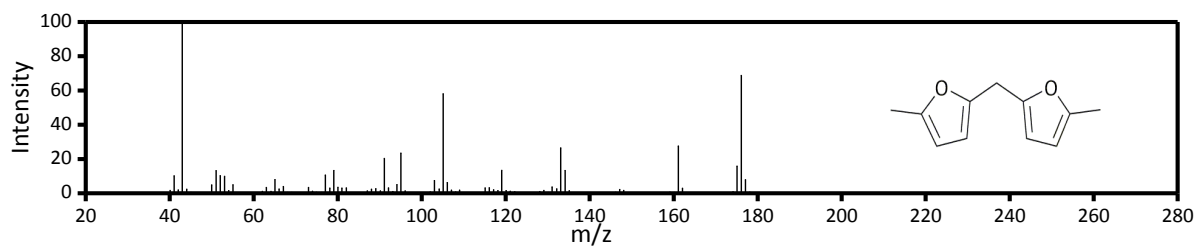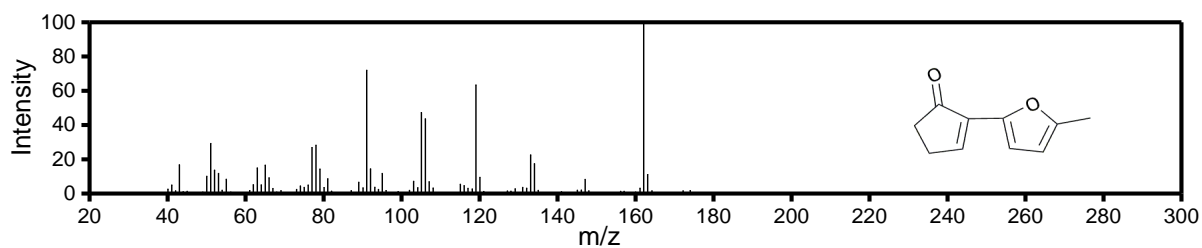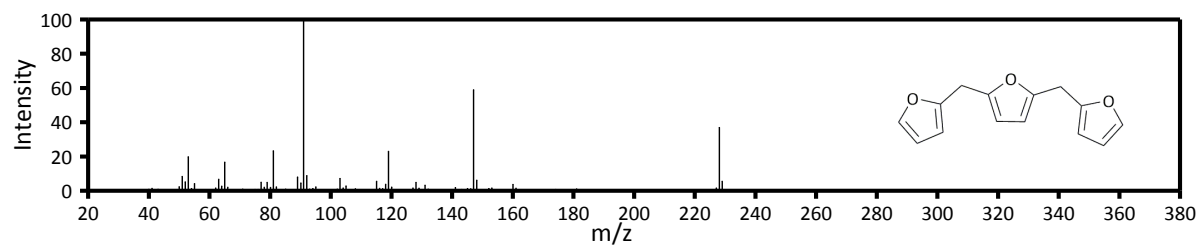



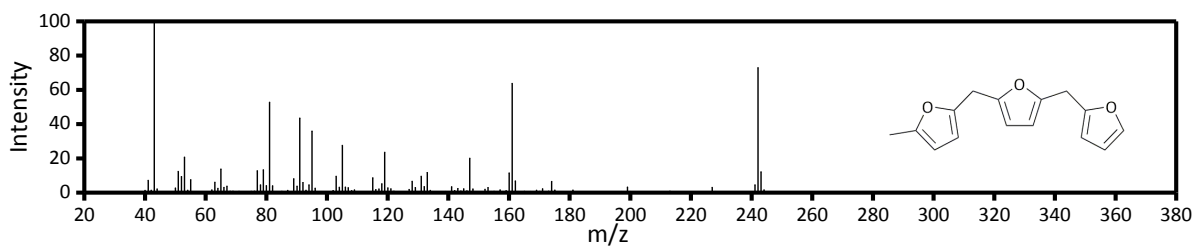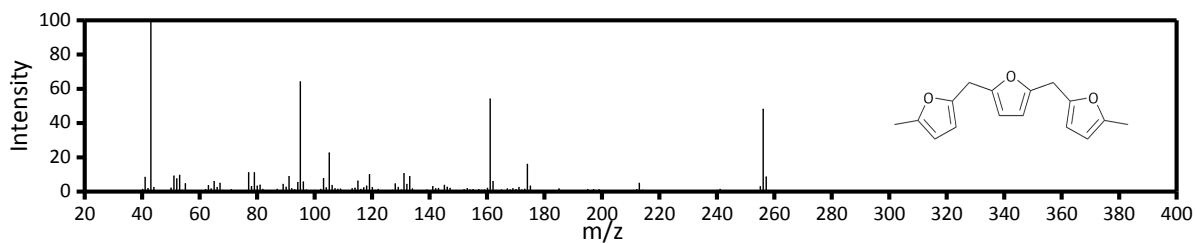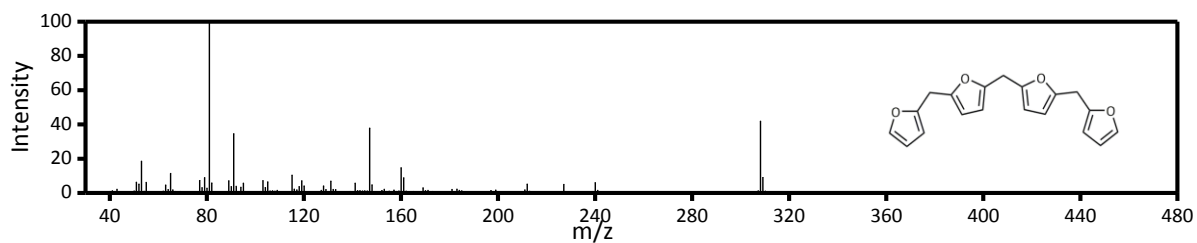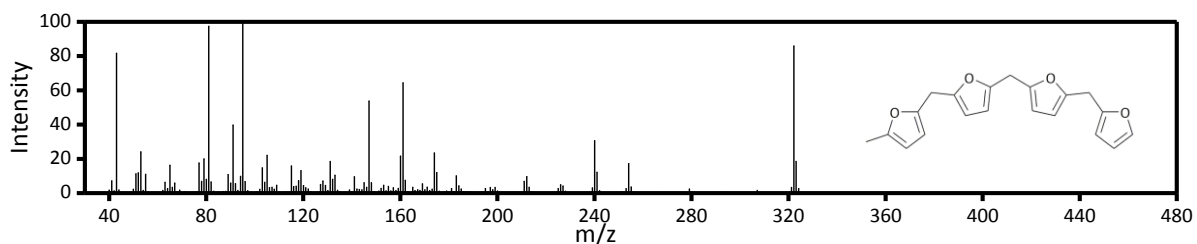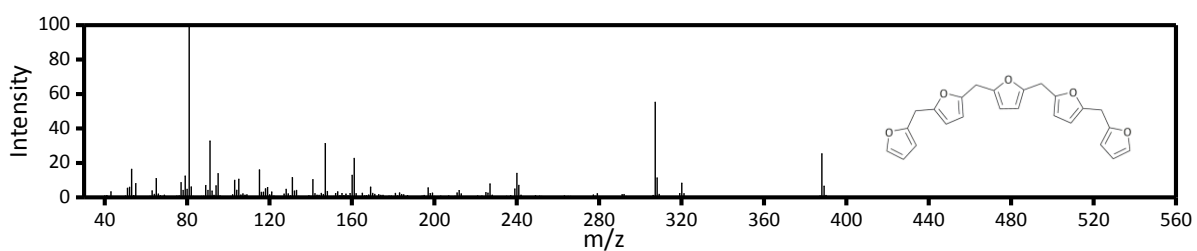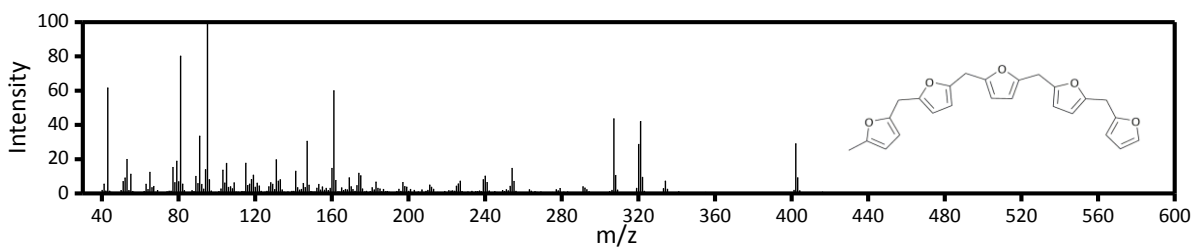

Supplement: d1nj04027h1.pdf [file d1nj04027h1.pdf]
